# Supplementary material
Source: PubMed Central journal article supplement (PMC308803)
Supplement: nar_32_suppl-1_D568__1.pdf [file nar_32_suppl-1_D568__1.pdf]

## Supplementary Material

### Addresses to access GXD

GXD can be accessed at The Jackson Laboratory through the Mouse Genome Informatics (MGI) Web site at <http://www.informatics.jax.org>, which provides integrated access to GXD and MGD data, or directly at

[http://www.informatics.jax.org/menus/expression\\_menu.shtml](http://www.informatics.jax.org/menus/expression_menu.shtml).

### GXD query forms

*Gene Expression Literature Index query form:*

[http://www.informatics.jax.org/searches/gxdindex\\_form.shtml](http://www.informatics.jax.org/searches/gxdindex_form.shtml)

*Gene Expression Data query form:*

[http://www.informatics.jax.org/searches/expression\\_form.shtml](http://www.informatics.jax.org/searches/expression_form.shtml)

*Gene Expression Data – Expanded query form:*

[http://www.informatics.jax.org/searches/expression\\_form\\_exp.shtml](http://www.informatics.jax.org/searches/expression_form_exp.shtml)

*Mouse Anatomical Dictionary Browser:*

[http://www.informatics.jax.org/searches/anatdict\\_form.shtml](http://www.informatics.jax.org/searches/anatdict_form.shtml)

*cDNA Clone query form:*

[http://www.informatics.jax.org/searches/estclone\\_form.shtml](http://www.informatics.jax.org/searches/estclone_form.shtml)

### Gene Expression Notebook

<http://www.informatics.jax.org/mgihome/GXD/GEN/>

## **Mouse Anatomical Dictionary**

*Mouse development:*

[http://www.informatics.jax.org/searches/anatdict\\_form.shtml](http://www.informatics.jax.org/searches/anatdict_form.shtml)

*Adult mouse:*

[http://www.informatics.jax.org/searches/AMA\\_form.shtml](http://www.informatics.jax.org/searches/AMA_form.shtml)

## **Additional information about GXD and the Mouse Gene Expression**

### **Information Resource**

<http://www.informatics.jax.org/mgihome/GXD/aboutGXD.shtml>

<http://www.informatics.jax.org/mgihome/GXD/gxdgen.shtml>

<http://genex.hgu.mrc.ac.uk>

<http://genex.hgu.mrc.ac.uk/Emage/database/intro.html>
